# Supplementary material for: Facile fabrication of ultrathin antibacterial hydrogel films via layer-by-layer “click” chemistry
Source: Royal Society of Chemistry journal article supplement (doi:10.1039/c4py00900b), 2014-01-01
Supplement: c4py00900b1.pdf [file c4py00900b1.pdf]

## Supporting Information

### Facile Fabrication of Ultrathin Antibacterial Hydrogel Films via Layer-by-Layer

#### “Click” Chemistry

Huan Wang,<sup>‡a</sup> Guangyu Zha,<sup>‡b</sup> Hong Du,<sup>a</sup> Lilong Gao,<sup>a</sup> Xiaodong Li,<sup>\*b</sup> Zhiquan

Shen<sup>a</sup> and Weipu Zhu<sup>\*a</sup>

<sup>a</sup> *MOE Key Laboratory of Macromolecular Synthesis and Functionalization, Department of Polymer Science and Engineering, Zhejiang University, Hangzhou 310027, China. E-mail: zhuwp@zju.edu.cn*

<sup>b</sup> *Department of Oral and Maxillofacial Surgery, Affiliated Stomatology Hospital, School of Medicine, Zhejiang University, Hangzhou 310006, China. E-mail: cisarli@zju.edu.cn*

† Electronic Supplementary Information (ESI) available: [details of any supplementary information available should be included here]. See DOI: 10.1039/b000000x/

‡ These authors contributed equally

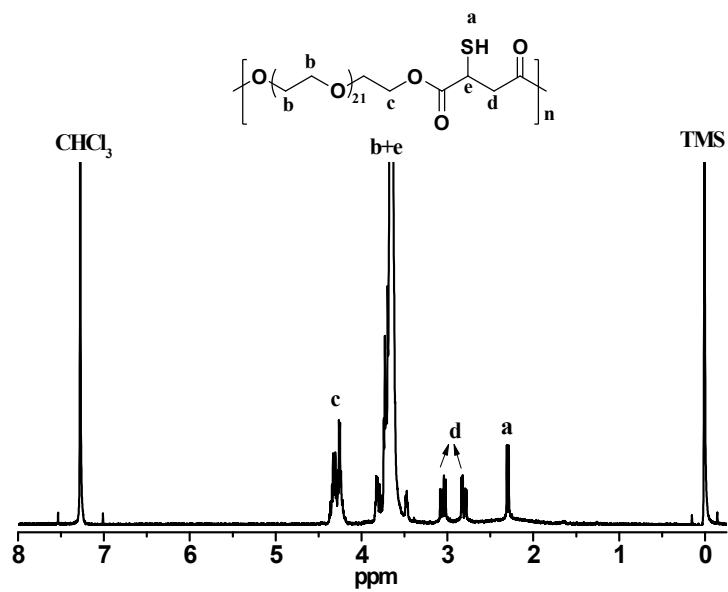

**Fig. S1** <sup>1</sup>H NMR spectrum of POEGMS.

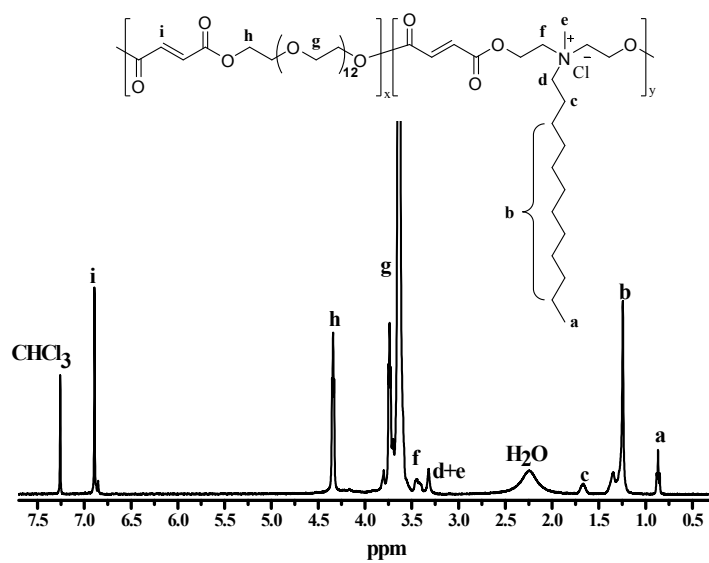

**Fig. S2** <sup>1</sup>H NMR spectrum of POEGDMAM.

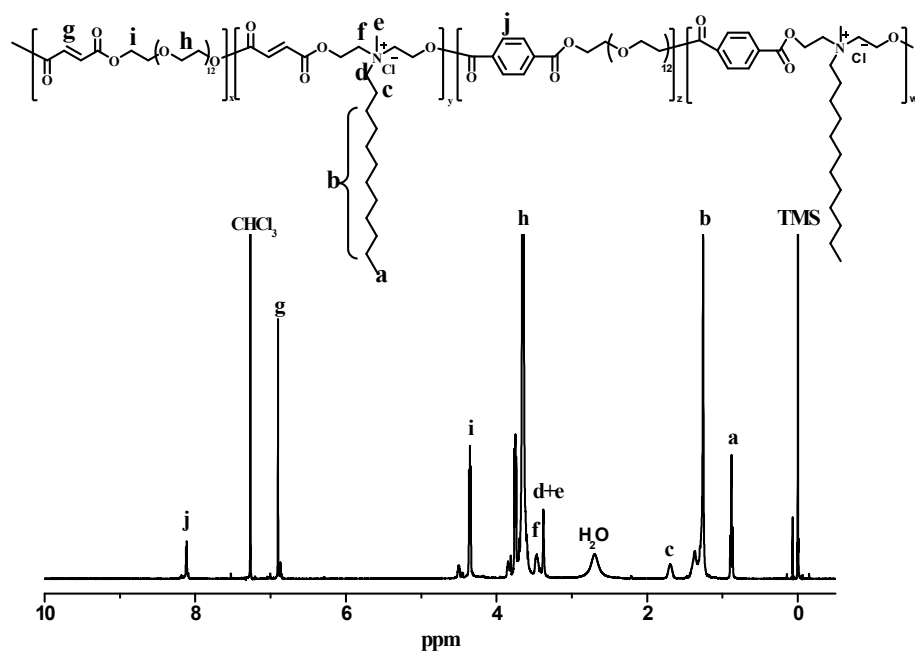

**Fig. S3** <sup>1</sup>H NMR spectrum of POEGDMAMT.

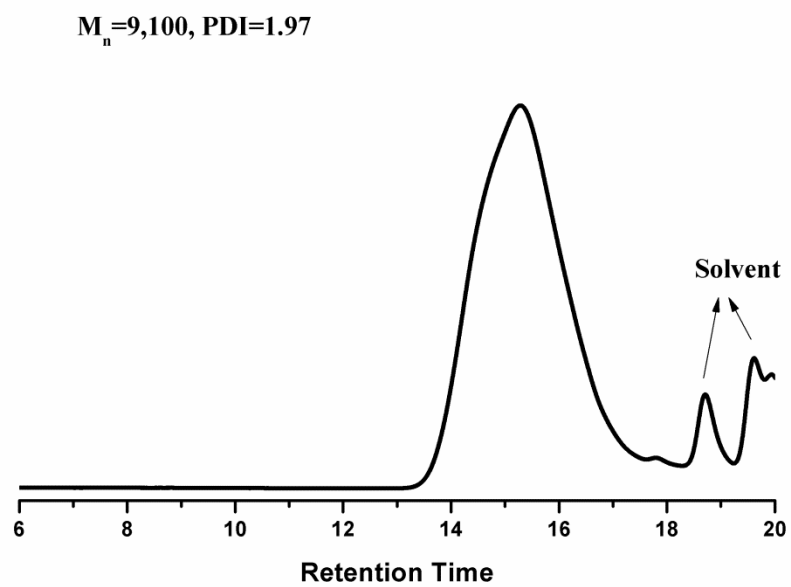

Fig. S4 GPC trace of POEGMS.

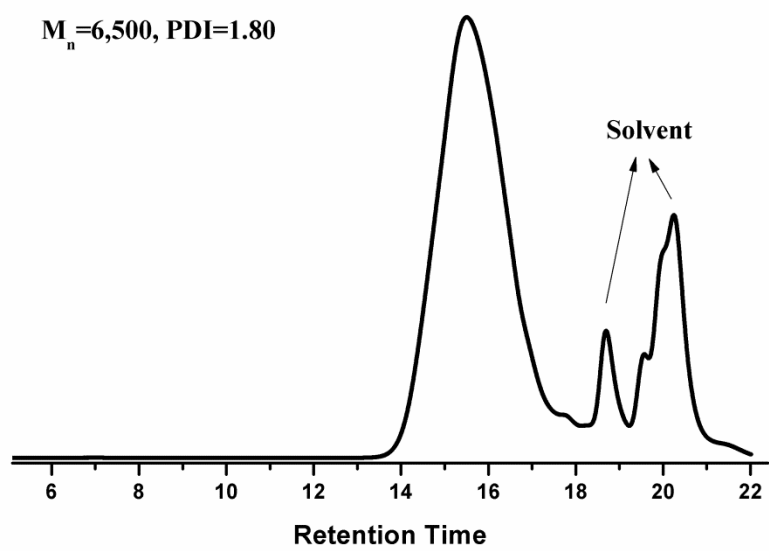

Fig. S5 GPC trace of POEGDMAM.
